# Supplementary material for: Enhancing photocatalytic N2 fixation under ambient conditions through Zn vacancy-mediated engineering of Cd0.5Zn0.5S
Source: Royal Society of Chemistry journal article supplement (doi:10.1039/d4cy01079e), 2024-12-27
Supplement: d4cy01079e1.pdf [file d4cy01079e1.pdf]

## Supplementary Material

### **Enhancing photocatalytic N<sub>2</sub> fixation under ambient conditions through Zn vacancy-mediated engineering in Cd<sub>0.5</sub>Zn<sub>0.5</sub>S**

Xiangju Ye,<sup>a</sup> Qiaoqiao Zhang,<sup>a,b</sup> Miaomiao Jiang,<sup>a</sup> Zhenzhen Hui,<sup>a</sup> Errui Wang,<sup>a</sup>  
Shifu Chen<sup>b\*</sup>

<sup>a</sup>College of Chemistry and Materials Engineering, Anhui Science and Technology  
University, Bengbu, Anhui 233030, P. R. China.

<sup>b</sup>College of Chemistry and Material Science, Huaibei Normal University, Huaibei,  
235000, P. R. China.

\*Corresponding author, Tel: +86-561-3806611, Fax: +86-561-3806611. E-mail:  
chshifu@chnu.edu.cn

## Experimental section

### Materials

All chemical reagents were purchased from Aladdin Reagent Company and used as received without additional purification or treatment. Homemade deionized water in our laboratory was used in all experiments.

### Characterization of samples

X-ray diffraction patterns were performed on a Bruker D8 Advance diffractometer with Cu-K $\alpha$  radiation ( $\lambda = 0.154056$  nm) and a scanning speed of 10 °/min to obtain the crystal phase of the samples. The element contents of Cd<sub>0.5</sub>Zn<sub>0.5</sub>S photocatalysts were detected by inductively coupled plasma-mass spectrometry (ICP-MS, Agilent 7700s). UV-Vis diffuse reflectance spectra (UV-Vis DRS) measurements were analyzed by a Shimadzu UV3600 UV-Vis-NIR spectrometer using BaSO<sub>4</sub> as a reflectance standard. X-ray photoelectron spectroscopy (XPS) measurements were carried out on a Kratos Axis Supra instrument using monochromatic Al K $\alpha$  radiation (1486.7 eV, 150 W). The binding energy values were calibrated using the contaminant carbon (C1s = 284.6 eV). The Brunauer-Emment-Teller (BET) surface areas were carried out by N<sub>2</sub> adsorption-desorption at 77.3 K using a Micromeritics ASAP 2460 instrument. The morphologies and microstructures of the photocatalysts were examined using a JEOL7800 F scanning electron microscopy (SEM). Transmission electron microscopy (TEM) and high-resolution transmission electron microscopy (HRTEM) images were collected using a FEI-G2 transmission electron microscope with an acceleration voltage of 200 kV. Electron paramagnetic resonance (EPR) measurements were carried out on a Bruker model A300 spectrometer with a 300 W Xe lamp (Beijing China Education Au-light Co., Ltd) equipped with a cut-off filter ( $\lambda \geq 420$  nm) as a visible light source. Electrochemical analysis was performed on a CHI 660D electrochemical workstation (Shanghai Chenhua) using a standard three-electrode quartz cell. To prepare the working electrode, a catalyst powder was

deposited on the tin-doped tin oxide (FTO) substrate. 5 mg catalyst powder was suspended in 5 mL of deionized water and the mixture was sonicated for 30 minutes. Then, 200  $\mu$ L or more of the slurry was coated on the FTO glass, which was used as a working electrode. A 300 W Xenon lamp (CEL-HXF300E7, Beijing China Education Au-light Co., Ltd) equipped with a 420 nm cutoff filter ( $\lambda \geq 420$  nm) was applied as a visible light source. Mott-Schottky (M-S) experiments of the resulting samples were analyzed in the potential range of -1.0 to 0.1 V with the amplitude of 0.01 at a constant frequency of 1000 Hz, with the electrolyte system consisting of 0.1 M KCl and 0.1 M  $\text{K}_3[\text{Fe}(\text{CN})_6]/\text{K}_4[\text{Fe}(\text{CN})_6]$  solution. During the photocurrent experiments, the electrolyte system is composed of 0.2 M  $\text{Na}_2\text{SO}_4$  solution.

### **Computational method**

The study used VASP to perform density functional theory calculations with projector augmented wave <sup>[1,2]</sup>. Electron spin polarization were considered in all calculations. The Perdew-Burke-Ernzerhof functional was employed for exchange-correlation effects <sup>[3]</sup>, while DFT+D3 was used for handling weak interactions <sup>[4]</sup>. The cut-off energy for the plane-wave basis was 450 eV. K-points were  $2 \times 2 \times 2$  in the Brillouin zone. Energy and maximum stress were converged to  $10^{-5}$  eV and 0.02 eV/ $\text{\AA}$ , respectively.

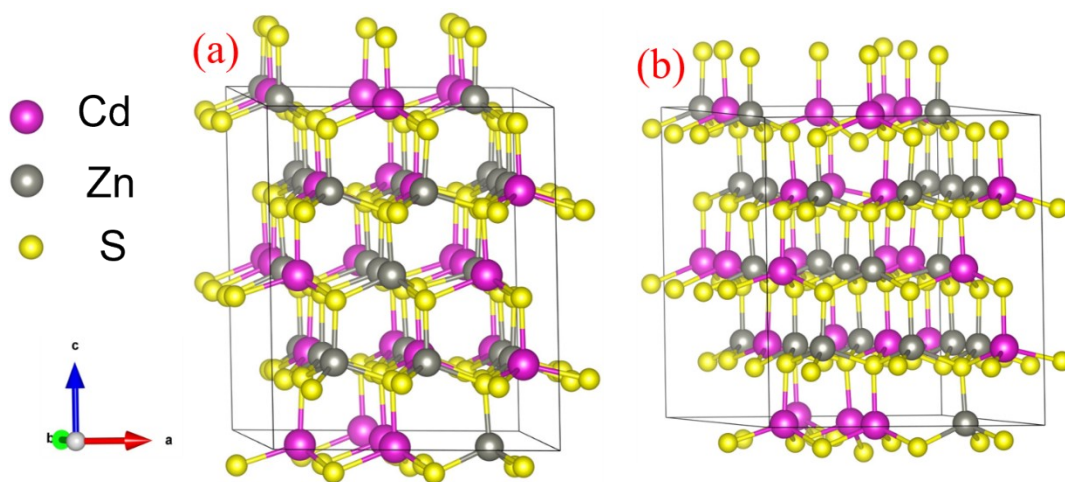

Fig. S1. Constructed  $\text{Cd}_{0.5}\text{Zn}_{0.5}\text{S}$  (a) and  $\text{V}_{\text{Zn}}\text{-Cd}_{0.5}\text{Zn}_{0.5}\text{S}$  (b) crystal structures.

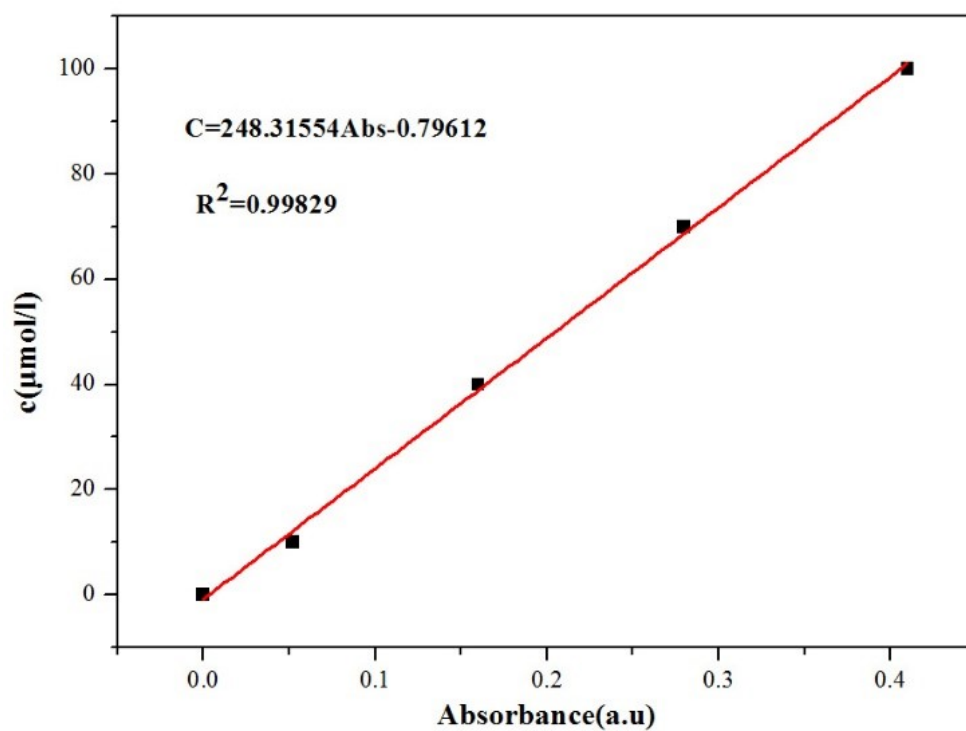

Fig. S2. The standard calibration curve for colorimetric  $\text{NH}_4^+$  assay obtained by a Nessler's reagent colorimetric method.

**Table S1** The comparison the photocatalytic performance in N<sub>2</sub> fixation of various materials with our prepared Cd<sub>0.5</sub>Zn<sub>0.5</sub>S samples.

| photocatalyst                                                   | Light source and wavelength                    | Catalyst dosage | ammonia evolution                                                                   | Reference |
|-----------------------------------------------------------------|------------------------------------------------|-----------------|-------------------------------------------------------------------------------------|-----------|
| Cd <sub>0.5</sub> Zn <sub>0.5</sub> S                           | 300 W Xe lamp ( $\lambda \geq 420$ nm)         | 30 mg           | 1465 $\mu\text{mol}\cdot\text{L}^{-1}\cdot\text{h}^{-1}$                            | This work |
| Ni <sub>2</sub> P/Cd <sub>0.5</sub> Zn <sub>0.5</sub> S         | 300 W Xe lamp ( $\lambda \geq 400$ nm)         | 20 mg           | 101.5 $\mu\text{mol}\cdot\text{L}^{-1}\cdot\text{h}^{-1}$                           | [5]       |
| V <sub>Zn</sub> -Zn <sub>3</sub> In <sub>2</sub> S <sub>6</sub> | 300 W Xe lamp ( $\lambda \geq 420$ nm)         | 30 mg           | 88.8 $\text{mg}\cdot\text{L}^{-1}\cdot\text{g}_{\text{cat}}^{-1}\cdot\text{h}^{-1}$ | [6]       |
| Ru/BiOBr-NF                                                     | 300 W Xe lamp ( $\lambda = 200\text{-}800$ nm) | 10 mg           | 121.97 $\mu\text{mol}\cdot\text{g}^{-1}\cdot\text{h}^{-1}$                          | [7]       |
| MIL-68(InFe) MOF                                                | 300 W Xe lamp ( $\lambda \geq 320$ nm)         | 5 mg            | 30.8 $\mu\text{mol}\cdot\text{g}^{-1}\cdot\text{h}^{-1}$                            | [8]       |
| NVs-g-C <sub>3</sub> N <sub>4</sub>                             | 300 W Xe lamp ( $\lambda > 420$ nm)            | 50 mg           | 1240 $\mu\text{mol}\cdot\text{g}_{\text{cat}}^{-1}\cdot\text{h}^{-1}$               | [9]       |
| AuRu <sub>x</sub>                                               | 300 W Xe lamp ( $\lambda = 200\text{-}800$ nm) | 0.2 mg          | 101.4 $\mu\text{mol}\cdot\text{g}^{-1}\cdot\text{h}^{-1}$                           | [10]      |
| Bi <sub>5</sub> O <sub>7</sub> Br-NT                            | 300 W Xe lamp ( $\lambda > 400$ nm)            | 25 mg           | 1.38 $\text{mmol}\cdot\text{g}^{-1}\cdot\text{h}^{-1}$                              | [11]      |
| TiO <sub>2</sub> nanosheets                                     | 300 W Xe lamp ( $\lambda = 200\text{-}800$ nm) | 20 mg           | 78.9 $\mu\text{mol}\cdot\text{g}^{-1}\cdot\text{h}^{-1}$                            | [12]      |
| Mo-doped W <sub>18</sub> O <sub>49</sub>                        | 300 W Xe lamp ( $\lambda > 400$ nm)            | 10 mg           | 195.5 $\mu\text{mol}\cdot\text{g}_{\text{cat}}^{-1}\cdot\text{h}^{-1}$              | [13]      |
| MoS <sub>2</sub> /UiO-66(SH) <sub>2</sub>                       | visible light ( $\lambda > 400$ nm)            | 25 mg           | 54.08 $\mu\text{mol}\cdot\text{g}^{-1}\cdot\text{h}^{-1}$                           | [14]      |
| COF4-Au                                                         | 300 W Xe lamp                                  | 10 mg           | 427.9±18.7 $\mu\text{mol}\cdot\text{g}^{-1}\cdot\text{h}^{-1}$                      | [15]      |
| g-C <sub>3</sub> N <sub>4</sub> -TiO <sub>2</sub>               | 300 W Xe lamp ( $\lambda > 420$ nm)            | 50 mg           | ~1.06 $\text{mmol}\cdot\text{g}^{-1}\cdot\text{h}^{-1}$                             | [16]      |
| Cs(6)Ru(2)@ZrO <sub>2</sub>                                     | 300 W Xe lamp                                  | 50 mg           | 5.1 $\text{mmol}\cdot\text{g}_{\text{cat}}^{-1}\cdot\text{h}^{-1}$                  | [17]      |

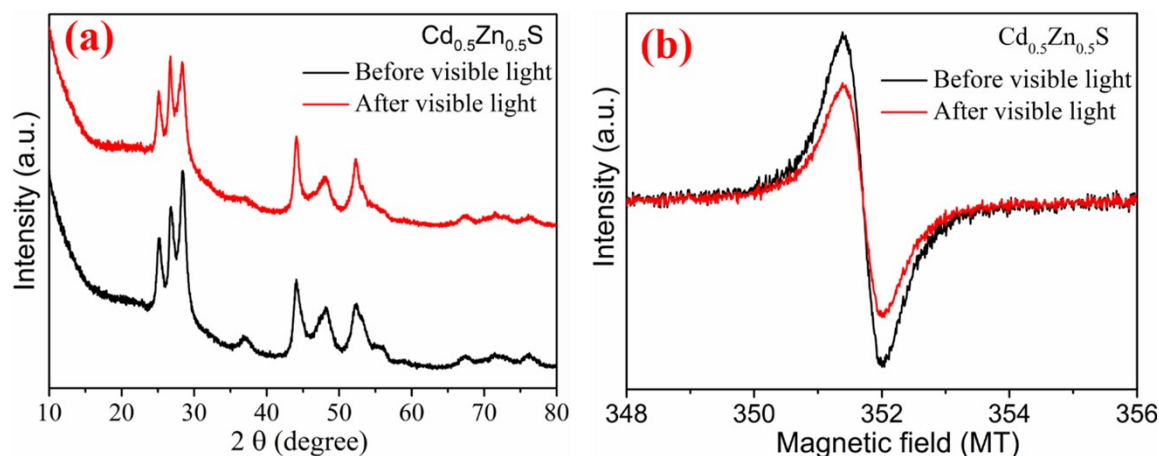

Fig. S3. XRD patterns (a) and EPR spectra (b) of the  $\text{Cd}_{0.5}\text{Zn}_{0.5}\text{S}$  sample synthesized at 200 °C before and after visible light reaction.

## Reference

- [1] G. Kresse, J. Furthmüller, Efficient iterative schemes for ab initio total-energy calculations using a plane-wave basis set. *Phys. Rev. B*, 1996, 54, 11169.
- [2] P. E. Blöchl, Projector augmented-wave method. *Phys. Rev. B*, 1994, 50, 17953-17979.
- [3] J. P. Perdew, K. Burke, M. Ernzerhof, Generalized gradient approximation made simple. *Phys. Rev. Lett.*, 1996, 77, 3865.
- [4] S. Grimme, J. Antony, S. Ehrlich, H. Krieg, A consistent and accurate ab initio parametrization of density functional dispersion correction (DFT-D) for the 94 elements H-Pu, *J. Chem. Phys.*, 2010, 132, 154104.
- [5] L. Ye, C. Han, Z. Ma, Y. Leng, J. Li, X. Ji, D. Bi, H. Xie, Z. Huang,  $\text{Ni}_2\text{P}$  loading on  $\text{Cd}_{0.5}\text{Zn}_{0.5}\text{S}$  solid solution for exceptional photocatalytic nitrogen fixation under visible light, *Chem. Eng. J.*, 2017, 307, 311-318.
- [6] H. Han, Y. Yang, J. Liu, X. Zheng, X. Wang, S. Meng, S. Zhang, X. Fu, S. Chen, Effect of Zn Vacancies in  $\text{Zn}_3\text{In}_2\text{S}_6$  Nanosheets on boosting photocatalytic  $\text{N}_2$  fixation, *ACS Appl. Energy Mater.*, 2020, 3, 11, 11275-11284.
- [7] Y. Xia, X. Xia, L. Chen, R. Liang, G. Yan, S. Liang, O defect anchored Ru on BiOBr with nanoconfined structure for catalytic  $\text{N}_2$  fixation, *Appl. Catal. B Environ. Energy*, 2024, 349, 123859.
- [8] C. Liu, M. Chen, Y. Chen, Q. Chen, J. Wu, S. Lin, L. Wu, J. C. Yu, Bimetallic MIL-68(InFe) MOF nanorods for biomimetic photocatalytic  $\text{N}_2$  fixation, *Chem. Eng. J.*, 2024, 498, 155646.

- [9] G. Dong, W. Ho, C. Wang, Selective photocatalytic N<sub>2</sub> fixation dependent on g-C<sub>3</sub>N<sub>4</sub> induced by nitrogen vacancies, *J. Mater. Chem. A*, 2015, 3, 23435-23441.
- [10] C. Hu, X. Chen, J. Jin, Y. Han, S. Chen, H. Ju, J. Cai, Y. Qiu, C. Gao, C. Wang, Z. Qi, R. Long, L. Song, Z. Liu, Y. Xiong, Surface plasmon enabling nitrogen fixation in pure water through a dissociative mechanism under mild conditions, *J. Am. Chem. Soc.*, 2019, 141, 7807-7814.
- [11] S. Wang, X. Hai, X. Ding, K. Chang, Y. Xiang, X. Meng, Z. Yang, H. Chen, J. Ye, Light-switchable oxygen vacancies in ultrafine Bi<sub>5</sub>O<sub>7</sub>Br nanotubes for boosting solar-driven nitrogen fixation in pure water. *Adv. Mater.*, 2017, 29 1701774.
- [12] Y. Zhao, Y. Zhao, R. Shi, B. Wang, G. Waterhouse, L. Wu, C. Tung, T. Zhang, Tuning oxygen vacancies in ultrathin TiO<sub>2</sub> nanosheets to boost photocatalytic nitrogen fixation up to 700 nm, *Adv. Mater.*, 2019, 31, 1806482.
- [13] N. Zhang, A. Jalil, D. Wu, S. Chen, Y. Liu, C. Gao, W. Ye, Z. Qi, H. Ju, C. Wang, X. Wu, L. Song, J. Zhu, Y. Xiong, Refining defect states in W<sub>18</sub>O<sub>49</sub> by Mo doping: A strategy for tuning N<sub>2</sub> activation towards solar-driven nitrogen fixation, *J. Am. Chem. Soc.*, 2018, 140, 9434-9443.
- [14] Q. Li, Y. Shi, Z. Wang, C. Liu, J. Bi, J. Yu, L. Wu, Nitrogen activation and surface charge regulation for enhancing the visible-light-driven N<sub>2</sub> fixation over MoS<sub>2</sub>/UiO-66(SH)<sub>2</sub>, *J. Colloid Interface Sci.*, 2023, 652, 1568-1577.
- [15] T. He, Z. Zhao, R. Liu, X. Liu, B. Ni, Y. Wei, Y. Wu, W. Yuan, H. Peng, Z. Jiang, Y. Zhao, Porphyrin-based covalent organic frameworks anchoring Au single atoms for photocatalytic nitrogen fixation, *J. Am. Chem. Soc.*, 2023, 145, 6057-6066.
- [16] N. Kwon, J. Park, X. Jin, S. Kim, H. Kim, S. Hwang, Defect-regulated two-dimensional superlattice of holey g-C<sub>3</sub>N<sub>4</sub>-TiO<sub>2</sub> nanohybrids: Contrasting influence of vacancy content on hybridization impact and photocatalyst performance, *ACS Nano*, 2023, 17, 23732-23745.
- [17] Y. Peng, A. Melillo, R. Shi, A. Forneli, A. Franconetti, J. Albero, H. García, Light-assistance in nitrogen fixation to ammonia by highly dispersed Cs-promoted Ru clusters supported on ZrO<sub>2</sub>, *Appl. Catal. B: Environ.*, 339 (2023) 123143.
